# Supplementary material
Source: publisher figshare collection journal article supplement (https://gsapubs.figshare.com/ndownloader/files/27561338)
Supplement: Supplementary file 1 [file 27561338]

Site	Age	Clade
Chiapas	Danian	Anguilloidei
Chiapas	Danian	Clupeoidei
Chiapas	Danian	Osteoglossidae
Chiapas	Danian	Pycnodontidae
Chiapas	Danian	Serranidae
Chiapas	Danian	Aulostomoidea
Chiapas	Danian	Pomacentridae
Ras_Gharib_A	PETM	Osteoglossidae
Ras_Gharib_A	PTEM	Clupeoidei
Ras_Gharib_A	PETM	Sternoptychidae
Ras_Gharib_A	PETM	Paralepididae
Ras_Gharib_A	PETM	Trichiuroidei
Ras_Gharib_A	PETM	Scombridae
Ras_Gharib_A	PETM	Menidae
Dabakhan_Canyon	Lutetian	Argentinidae
Dabakhan_Canyon	Lutetian	Sternoptychidae
Dabakhan_Canyon	Lutetian	Astronesthidae
Dabakhan_Canyon	Lutetian	Myctophidae
Dabakhan_Canyon	Lutetian	Bregmacerotoidei
Dabakhan_Canyon	Lutetian	Lophotidae
Dabakhan_Canyon	Lutetian	Euzaphlegidae
Dabakhan_Canyon	Lutetian	Trichiuroidei
Dabakhan_Canyon	Lutetian	Scombridae
Dabakhan_Canyon	Lutetian	Palaeorhynchidae
Gorny_Luch	Bartonian	Elopidae
Gorny_Luch	Bartonian	Anguilloidei
Gorny_Luch	Bartonian	Clupeoidei
Gorny_Luch	Bartonian	Photichthyidae
Gorny_Luch	Bartonian	Bregmacerotoidei
Gorny_Luch	Bartonian	analectid
Gorny_Luch	Bartonian	Zeiformes
Gorny_Luch	Bartonian	Centriscoidea
Gorny_Luch	Bartonian	Priacanthidae
Gorny_Luch	Bartonian	Epigonidae
Gorny_Luch	Bartonian	Malacanthidae
Gorny_Luch	Bartonian	Carangidae
Gorny_Luch	Bartonian	Siganidae
Gorny_Luch	Bartonian	Acanthuridae
Gorny_Luch	Bartonian	Euzaphlegidae
Gorny_Luch	Bartonian	Trichiuroidei
Gorny_Luch	Bartonian	Scombridae
Gorny_Luch	Bartonian	Palaeorhynchidae
Gorny_Luch	Bartonian	Stromateoidei
Gorny_Luch	Bartonian	Moloidea
Gorny_Luch	Bartonian	Tetraodontoidea
Gorny_Luch	Bartonian	Luvaridae
Gorny_Luch	Bartonian	Balistoidea
Gorny_Luch	Bartonian	Caucasichthyidae
Gorny_Luch	Bartonian	Aulorhamphidae
Gorny_Luch	Bartonian	Lophiidae
Gorny_Luch	Bartonian	Champsodontidae
Gorny_Luch	Bartonian	Gonostomatidae
Gorny_Luch	Bartonian	Acropomatidae
London_Clay	Ypresian	Acipenseridae
London_Clay	Ypresian	Amiidae
London_Clay	Ypresian	Pycnodontidae
London_Clay	Ypresian	Megalopidae
London_Clay	Ypresian	Elopidae
London_Clay	Ypresian	Albulidae
London_Clay	Ypresian	Anguilloidei
London_Clay	Ypresian	Osteoglossidae
London_Clay	Ypresian	Gonorynchiformes
London_Clay	Ypresian	Clupeoidei
London_Clay	Ypresian	Siluriformes
London_Clay	Ypresian	Synodontidae
London_Clay	Ypresian	Lamprididae
London_Clay	Ypresian	Gadiformes-Bregmacerotoidei
London_Clay	Ypresian	Holocentridae
London_Clay	Ypresian	Ophidiiformes
London_Clay	Ypresian	Pegasidae
London_Clay	Ypresian	Trichiuroidei
London_Clay	Ypresian	Scombridae
London_Clay	Ypresian	Sphyraenidae
London_Clay	Ypresian	Carangidae
London_Clay	Ypresian	Xiphioidei
London_Clay	Ypresian	Palaeorhynchidae
London_Clay	Ypresian	Ephippidae
London_Clay	Ypresian	Sparidae
London_Clay	Ypresian	Luvaridae
London_Clay	Ypresian	Triodontoidea
Monte_Solane	Ypresian	Clupeoidei
Monte_Solane	Ypresian	Gonostomatidae
Monte_Solane	Ypresian	Apogonidae
Monte_Solane	Ypresian	Euzaphlegidae
Monte_Solane	Ypresian	Trichiuroidei
Danata_Formation	PETM	Osteoglossidae
Danata_Formation	PETM	Pachyrhizodontidae
Danata_Formation	PETM	Anguilloidei
Danata_Formation	PETM	Clupeoidei
Danata_Formation	PETM	Gonorynchiformes
Danata_Formation	PETM	Sardinoididae
Danata_Formation	PETM	Lamprididae
Danata_Formation	PETM	analectid
Danata_Formation	PETM	Centriscoidea
Danata_Formation	PETM	Aulostomoidea
Danata_Formation	PETM	Serranidae
Danata_Formation	PETM	Carangidae
Danata_Formation	PETM	Apolectidae
Danata_Formation	PETM	Epigonidae
Danata_Formation	PETM	Caseonidae
Danata_Formation	PETM	Menidae
Danata_Formation	PETM	Exelliidae
Danata_Formation	PETM	Luvaridae
Danata_Formation	PETM	Kushlukiidae
Danata_Formation	PETM	Siganidae
Danata_Formation	PETM	Euzaphlegidae
Danata_Formation	PETM	Trichiuroidei
Danata_Formation	PETM	Scombridae
Danata_Formation	PETM	Xiphioidei
Danata_Formation	PETM	Balistoidea
Stolleklint_Clay	PETM	Osteoglossidae
Stolleklint_Clay	PETM	Megalopidae
Stolleklint_Clay	PETM	Anguilloidei
Stolleklint_Clay	PETM	Clupeoidei
Stolleklint_Clay	PETM	Argentinidae
Stolleklint_Clay	PETM	Osmeridae
Stolleklint_Clay	PETM	Siluriformes
Stolleklint_Clay	PETM	Aulostomoidea
Stolleklint_Clay	PETM	Gadiformes-Bregmacerotoidei
Stolleklint_Clay	PETM	Percopsiformes
Stolleklint_Clay	PETM	Caproidae
Stolleklint_Clay	PETM	Carangidae
Stolleklint_Clay	PETM	Menidae
Stolleklint_Clay	PETM	Scorpaenoidei
Stolleklint_Clay	PETM	Triacanthoidea
Fur_Formation	Ypresian	Osteoglossidae
Fur_Formation	Ypresian	Megalopidae
Fur_Formation	Ypresian	Anguilloidei
Fur_Formation	Ypresian	Clupeoidei
Fur_Formation	Ypresian	Argentinidae
Fur_Formation	Ypresian	Osmeridae
Fur_Formation	Ypresian	Salmonidae
Fur_Formation	Ypresian	Gonorynchiformes
Fur_Formation	Ypresian	Paralepididae
Fur_Formation	Ypresian	Centriscoidea
Fur_Formation	Ypresian	Aulostomoidea
Fur_Formation	Ypresian	Pegasidae
Fur_Formation	Ypresian	Gadiformes-Bregmacerotoidei
Fur_Formation	Ypresian	Bregmacerotoidei
Fur_Formation	Ypresian	Polymixiidae
Fur_Formation	Ypresian	Palaeocentrotidae
Fur_Formation	Ypresian	analectid
Fur_Formation	Ypresian	Zeiformes
Fur_Formation	Ypresian	Caproidae
Fur_Formation	Ypresian	Carangidae
Fur_Formation	Ypresian	Scombridae
Fur_Formation	Ypresian	Euzaphlegidae
Fur_Formation	Ypresian	Palaeorhynchidae
Fur_Formation	Ypresian	Xiphioidei
Fur_Formation	Ypresian	Stromateoidei
Fur_Formation	Ypresian	Exelliidae
Fur_Formation	Ypresian	Scorpaenoidei
Bolca	Ypresian	Pycnodontidae
Bolca	Ypresian	Pachyrhizodontidae
Bolca	Ypresian	Foreyichthyidae
Bolca	Ypresian	Osteoglossidae
Bolca	Ypresian	Anguilloidei
Bolca	Ypresian	Ellimmichthyiformes
Bolca	Ypresian	Clupeoidei
Bolca	Ypresian	Engrauloidei
Bolca	Ypresian	Chanoididae
Bolca	Ypresian	Paralepididae
Bolca	Ypresian	Veliferidae
Bolca	Ypresian	Zeiformes
Bolca	Ypresian	Lophiidae
Bolca	Ypresian	Brachionichthyidae
Bolca	Ypresian	Antennariidae
Bolca	Ypresian	Ogocephalidae
Bolca	Ypresian	Atherinidae
Bolca	Ypresian	Rhamphognathidae
Bolca	Ypresian	Mesogasteridae
Bolca	Ypresian	Exocoetidae
Bolca	Ypresian	Hemiramphidae
Bolca	Ypresian	Holocentridae
Bolca	Ypresian	Callionymoidei
Bolca	Ypresian	Pegasidae
Bolca	Ypresian	Aulostomoidea
Bolca	Ypresian	Aulorhamphidae
Bolca	Ypresian	Centriscoidea
Bolca	Ypresian	Pterygocephalidae
Bolca	Ypresian	Pietschellidae
Bolca	Ypresian	Centropomidae
Bolca	Ypresian	Percichthyidae
Bolca	Ypresian	Acropomatidae
Bolca	Ypresian	Priacanthidae
Bolca	Ypresian	Apogonidae
Bolca	Ypresian	Pomatomidae
Bolca	Ypresian	Ductoridae
Bolca	Ypresian	Carangidae
Bolca	Ypresian	Menidae
Bolca	Ypresian	Leiognathidae
Bolca	Ypresian	Exelliidae
Bolca	Ypresian	Lutjanidae
Bolca	Ypresian	Gerreidae
Bolca	Ypresian	Sparidae
Bolca	Ypresian	Quasimullidae
Bolca	Ypresian	Monodactylidae
Bolca	Ypresian	Ephippidae
Bolca	Ypresian	Scatophagidae
Bolca	Ypresian	Pomacentridae
Bolca	Ypresian	Carangodidae
Bolca	Ypresian	Eocottidae
Bolca	Ypresian	Robertanniidae
Bolca	Ypresian	Sphyraenidae
Bolca	Ypresian	Tortonesidae
Bolca	Ypresian	Labridae
Bolca	Ypresian	Callipterygidae
Bolca	Ypresian	Gobioidei
Bolca	Ypresian	Caproidae
Bolca	Ypresian	Sorbinipercidae
Bolca	Ypresian	Zorzinichthyidae
Bolca	Ypresian	Acanthonemidae
Bolca	Ypresian	Siganidae
Bolca	Ypresian	Acanthuridae
Bolca	Ypresian	Zanclidae
Bolca	Ypresian	Massalongiidae
Bolca	Ypresian	Scorpaenoidei
Bolca	Ypresian	Euzaphlegidae
Bolca	Ypresian	Scombridae
Bolca	Ypresian	Xiphioidei
Bolca	Ypresian	Palaeorhynchidae
Bolca	Ypresian	Stromateoidei
Bolca	Ypresian	Amphistiidae
Bolca	Ypresian	Pleuronectoidei
Bolca	Ypresian	Triacanthoidea
Bolca	Ypresian	Ostracicoidea
Bolca	Ypresian	Balistoidea
Bolca	Ypresian	Eoplectidae
Bolca	Ypresian	Moloidea
Bolca	Ypresian	Tetraodontoidea
Calcaire_Grossier	Lutetian	Centropomidae
Calcaire_Grossier	Lutetian	Menidae
Calcaire_Grossier	Lutetian	Palaeorhynchidae
Calcaire_Grossier	Lutetian	Ephippidae
Calcaire_Grossier	Lutetian	Carangidae
Calcaire_Grossier	Lutetian	Amphistiidae
Calcaire_Grossier	Lutetian	Pleuronectoidei
Calcaire_Grossier	Lutetian	Scombridae
Kapurdi_Formation	Ypresian	Osteoglossidae
Kapurdi_Formation	Ypresian	Clupeoidei
Kapurdi_Formation	Ypresian	Menidae
Kapurdi_Formation	Ypresian	Exelliidae
Kapurdi_Formation	Ypresian	Pleuronectoidei
Kapurdi_Formation	Ypresian	Euzaphlegidae
Elam	Priabonian	Anguilloidei
Elam	Priabonian	Aulostomoidea
Elam	Priabonian	Berycidae
Elam	Priabonian	Holocentridae
Elam	Priabonian	Clupeoidei
Elam	Priabonian	Gonostomatidae
Elam	Priabonian	Astronesthidae
Elam	Priabonian	Bregmacerotoidei
Elam	Priabonian	Lophotidae
Elam	Priabonian	Sphyraenidae
Elam	Priabonian	Priacanthidae
Elam	Priabonian	Euzaphlegidae
Elam	Priabonian	Carangidae
Elam	Priabonian	Ophidiiformes
Elam	Priabonian	Scombridae
Elam	Priabonian	Trichiuroidei
Elam	Priabonian	Palaeorhynchidae
Elam	Priabonian	Stromateoidei
Istehbanat	Priabonian	Clupeoidei
Istehbanat	Priabonian	Sphyraenidae
Istehbanat	Priabonian	Priacanthidae
Istehbanat	Priabonian	Labridae
Istehbanat	Priabonian	Acanthuridae
Istehbanat	Priabonian	Scombridae
Istehbanat	Priabonian	Palaeorhynchidae
Limhamn	Danian	Clupeoidei
Limhamn	Danian	Dercetidae
Limhamn	Danian	Polymixiidae
Limhamn	Danian	Trachichthyoidei
Limhamn	Danian	Palaeocentrotidae
Limhamn	Danian	Serranidae
Maastricht	Maastrichtian	Pycnodontidae
Maastricht	Maastrichtian	Aspidorhynchidae
Maastricht	Maastrichtian	Saurodontidae
Maastricht	Maastrichtian	Enchodontidae
Maastricht	Maastrichtian	Dercetidae
Maastricht	Maastrichtian	Cimolichthyidae
Maastricht	Maastrichtian	Ichthyotringidae
Maastricht	Maastrichtian	Pachyrhizodontidae
Maastricht	Maastrichtian	Trachichthyoidei
Ciply_Malogne_Phosphatic_Chalk	Maastrichtian	Pycnodontidae
Ciply_Malogne_Phosphatic_Chalk	Maastrichtian	Pachycormidae
Ciply_Malogne_Phosphatic_Chalk	Maastrichtian	Pachyrhizodontidae
Ciply_Malogne_Phosphatic_Chalk	Maastrichtian	Saurodontidae
Ciply_Malogne_Phosphatic_Chalk	Maastrichtian	Enchodontidae
Ciply_Malogne_Phosphatic_Chalk	Maastrichtian	Cimolichthyidae
Ciply_Malogne_Phosphatic_Chalk	Maastrichtian	Trachichthyoidei
Lillebaelt_Clay	Lutetian	Ophidiiformes
Lillebaelt_Clay	Lutetian	Gadiformes-Bregmacerotoidei
Lillebaelt_Clay	Lutetian	Xiphioidei
Lillebaelt_Clay	Lutetian	Trichiuroidei
La_Meseta_Formation_Cucullaea_I_Allomember	Ypresian	Clupeoidei
La_Meseta_Formation_Cucullaea_I_Allomember	Ypresian	Oplegnathidae
La_Meseta_Formation_Cucullaea_I_Allomember	Ypresian	Xiphioidei
La_Meseta_Formation_Cucullaea_I_Allomember	Ypresian	Trichiuroidei
La_Meseta_Formation_Cucullaea_I_Allomember	Ypresian	Labridae
La_Meseta_Formation_Cucullaea_I_Allomember	Ypresian	Siluriformes
La_Meseta_Formation_Cucullaea_I_Allomember	Ypresian	Gadiformes-Bregmacerotoidei
Nardo	Maastrichtian	Aipichthyidae
Nardo	Maastrichtian	Albulidae
Nardo	Maastrichtian	Anguilloidei
Nardo	Maastrichtian	Clupeoidei
Nardo	Maastrichtian	Dercetidae
Nardo	Maastrichtian	Elopidae
Nardo	Maastrichtian	Gonorynchiformes
Nardo	Maastrichtian	Centriscoidea
Nardo	Maastrichtian	Nardoichthyidae
Nardo	Maastrichtian	Pachyrhizodontidae
Nardo	Maastrichtian	Plectocretacicoidei
Nardo	Maastrichtian	Pycnodontidae
Nardo	Maastrichtian	Sardinoididae
Nardo	Maastrichtian	Saurodontidae
Nardo	Maastrichtian	Trachichthyoidei
Nardo	Maastrichtian	Veliferidae
Nardo	Maastrichtian	Zeiformes
Balkaria	PETM	Anguilloidei
Balkaria	PETM	Clupeoidei
Balkaria	PETM	Aulostomoidea
Balkaria	PETM	Tetraodontoidea
Landana	Selandian	Pycnodontidae
Landana	Selandian	Albulidae
Landana	Selandian	Osteoglossidae
Landana	Selandian	Scombridae
Pindos_Unit	Maastrichtian	Elopidae
Pindos_Unit	Maastrichtian	Ichthyotringidae
Pindos_Unit	Maastrichtian	Enchodontidae
Pindos_Unit	Maastrichtian	Dercetidae
